1 **Bispecific antibody neutralizes circulating SARS-CoV-2 variants, prevents**  
2 **escape and protects mice from disease**

3  
4 Raoul De Gasparo<sup>a,#</sup>, Mattia Pedotti<sup>a,#</sup>, Luca Simonelli<sup>a</sup>, Petr Nickl<sup>b</sup>, Frauke Muecksch<sup>h</sup>, Irene  
5 Cassaniti<sup>k</sup>, Elena Percivalle<sup>k</sup>, Julio C. C. Lorenzi<sup>i</sup>, Federica Mazzola<sup>a</sup>, Davide Magri<sup>j</sup>, Tereza  
6 Michalcikova<sup>b</sup>, Jan Haviernik<sup>c</sup>, Vaclav Honig<sup>c,d</sup>, Blanka Mrazkova<sup>b</sup>, Natalie Polakova<sup>b</sup>, Andrea  
7 Fortova<sup>c</sup>, Jolana Tureckova<sup>b</sup>, Veronika Iatsiuk<sup>b</sup>, Salvatore Di Girolamo<sup>a</sup>, Martin Palus<sup>c,d</sup>, Dagmar  
8 Zudova<sup>b</sup>, Petr Bednar<sup>c,e</sup>, Ivana Bukova<sup>b</sup>, Filippo Bianchini<sup>a</sup>, Dora Mehn<sup>i</sup>, Radim Nencka<sup>f</sup>, Petra  
9 Strakova<sup>c</sup>, Oto Pavlis<sup>g</sup>, Jan Rozman<sup>b</sup>, Sabrina Gioria<sup>j</sup>, Josè Camilla Sammartino<sup>k</sup>, Federica  
10 Giardina<sup>k</sup>, Stefano Gaiarsa<sup>k</sup>, Qiang Pan Hammarström<sup>m</sup>, Christopher O. Barnes<sup>n</sup>, Pamela J.  
11 Bjorkman<sup>n</sup>, Luigi Calzolari<sup>j</sup>, Antonio Piralla<sup>k</sup>, Fausto Baldanti<sup>k</sup>, Michel C. Nussenzweig<sup>i,l</sup>, Paul D.  
12 Bieniasz<sup>h,l</sup>, Theodora Hatzioannou<sup>h</sup>, Jan Prochazka<sup>b</sup>, Radislav Sedlacek<sup>b</sup>, Davide F. Robbiani<sup>a\*</sup>,  
13 Daniel Ruzek<sup>c,d\*</sup>, Luca Varani<sup>a\*</sup>.

14  
15 <sup>a</sup> Institute for Research in Biomedicine, Università della Svizzera italiana (USI), Bellinzona,  
16 Switzerland

17 <sup>b</sup> Czech Centre of Phenogenomics, Institute of Molecular Genetics of the Czech Academy of  
18 Sciences, Vestec, Czech Republic.

19 <sup>c</sup> Veterinary Research Institute, Brno, Czech Republic

20 <sup>d</sup> Institute of Parasitology, Biology Centre of the Czech Academy of Sciences, Ceske  
21 Budejovice, Czech Republic

22 <sup>e</sup> Faculty of Science, University of South Bohemia, Ceske Budejovice, Czech Republic

23 <sup>f</sup> Institute of Organic Chemistry and Biochemistry of the Czech Academy of Sciences, Prague,  
24 Czech Republic

25 <sup>g</sup> Center of Biological Defense, Military Health Institute, Military Medical Agency, Techonin,  
26 Czech Republic

27 <sup>h</sup> Laboratory of Retrovirology, The Rockefeller University, New York, NY, USA

28 <sup>i</sup> Laboratory of Molecular Immunology, The Rockefeller University, New York, NY, USA

29 <sup>j</sup> European Commission, Joint Research Centre, Ispra, VA, Italy

30 <sup>k</sup> Molecular Virology Unit, Microbiology and Virology Department, Fondazione IRCCS  
31 Policlinico San Matteo, Pavia, Italy

32 <sup>l</sup> Howard Hughes Medical Institute, The Rockefeller University, New York, NY, USA

33 <sup>m</sup> Department of Biosciences and Nutrition, Karolinska Institutet, SE14183, Huddinge, Sweden

34 <sup>n</sup> Division of Biology and Biological Engineering, California Institute of Technology, Pasadena,  
35 CA, USA

36

37 <sup>#</sup> These authors contributed equally

38 <sup>\*</sup> Corresponding authors

39

40

41 **Summary**

42 Neutralizing antibodies targeting the receptor binding domain (RBD) of the SARS-CoV-2 Spike  
43 (S) are among the most promising approaches against coronavirus disease 2019 (COVID-19)<sup>1,2</sup>.  
44 We developed a bispecific, IgG1-like molecule (CoV-X2) based on two antibodies derived from  
45 COVID-19 convalescent donors, C121 and C135<sup>3</sup>. CoV-X2 simultaneously binds two independent  
46 sites on the RBD and, unlike its parental antibodies, prevents detectable S binding to Angiotensin-  
47 Converting Enzyme 2 (ACE2), the virus cellular receptor. Furthermore, CoV-X2 neutralizes  
48 SARS-CoV-2 and its variants of concern, as well as the escape mutants generated by the parental  
49 monoclonals. In a novel animal model of SARS-CoV-2 infection with lung inflammation, CoV-  
50 X2 protects mice from disease and suppresses viral escape. Thus, simultaneous targeting of non-  
51 overlapping RBD epitopes by IgG-like bispecific antibodies is feasible and effective, combining  
52 into a single molecule the advantages of antibody cocktails.

53

54 The COVID-19 pandemic prompted an unprecedented effort to develop effective countermeasures  
55 against SARS-CoV-2. Pre-clinical data and phase III clinical studies indicate that monoclonal  
56 antibodies (mAbs) could be effectively deployed for prevention or treatment during the viral  
57 symptoms phase of the disease<sup>1,2</sup>. Cocktails of two or more mAbs are preferred over a single  
58 antibody for increased efficacy and prevention of viral escape. However, this approach requires  
59 increased manufacturing costs and volumes, which are problematic at a time when the supply chain  
60 is under pressure to meet the high demand for COVID-19 therapeutics, vaccines and biologics in  
61 general<sup>4</sup>. Cocktails also complicate formulation<sup>5,6</sup> and hinder novel strategies like antibody  
62 delivery by viral vectors or by non-vectored nucleic acids<sup>7-9</sup>. Instead, multispecific antibodies  
63 embody the advantages of a cocktail within a single molecule.

64 To this avail, we employed structural information<sup>10</sup> and computational simulations to  
65 design bispecifics that would simultaneously bind to (i) independent sites on the same RBD and  
66 (ii) distinct RBDs on a S trimer. Out of several designs evaluated by atomistic Molecular Dynamics  
67 simulations, 4 were produced and CoV-X2 was the most potent neutralizer of SARS-CoV-2  
68 pseudovirus, with half-maximal inhibitory concentration ( $IC_{50}$ ) = 0.04 nM (5.8 ng/mL) (Extended  
69 Data Fig.1). CoV-X2 is a human-derived, CrossMAb-format IgG1-like bispecific antibody<sup>11</sup>  
70 resulting from the combination of the Fragment antigen binding (Fab) of mAbs C121 and C135,  
71 two potent SARS-CoV-2 neutralizers<sup>3</sup>. Structural predictions showed that CoV-X2, but not its  
72 parental monoclonals, can bind bivalently to all RBD conformations on the S trimer, preventing  
73 ACE2 access (Fig.1a and Extended Data Fig.2)<sup>12</sup>.

74 CoV-X2 bound with low nanomolar affinity to RBD, S trimer, and to several mutants,  
75 including the naturally occurring variants B.1 (D614G in S protein), B.1.1.7 (N501Y in RBD) and

76 B.1.351 (K417N, E484K and N501Y in RBD)<sup>13,14</sup>, and the escape mutants of the parental mAbs<sup>15</sup>  
 77 (Extended Data Figs.3-5).

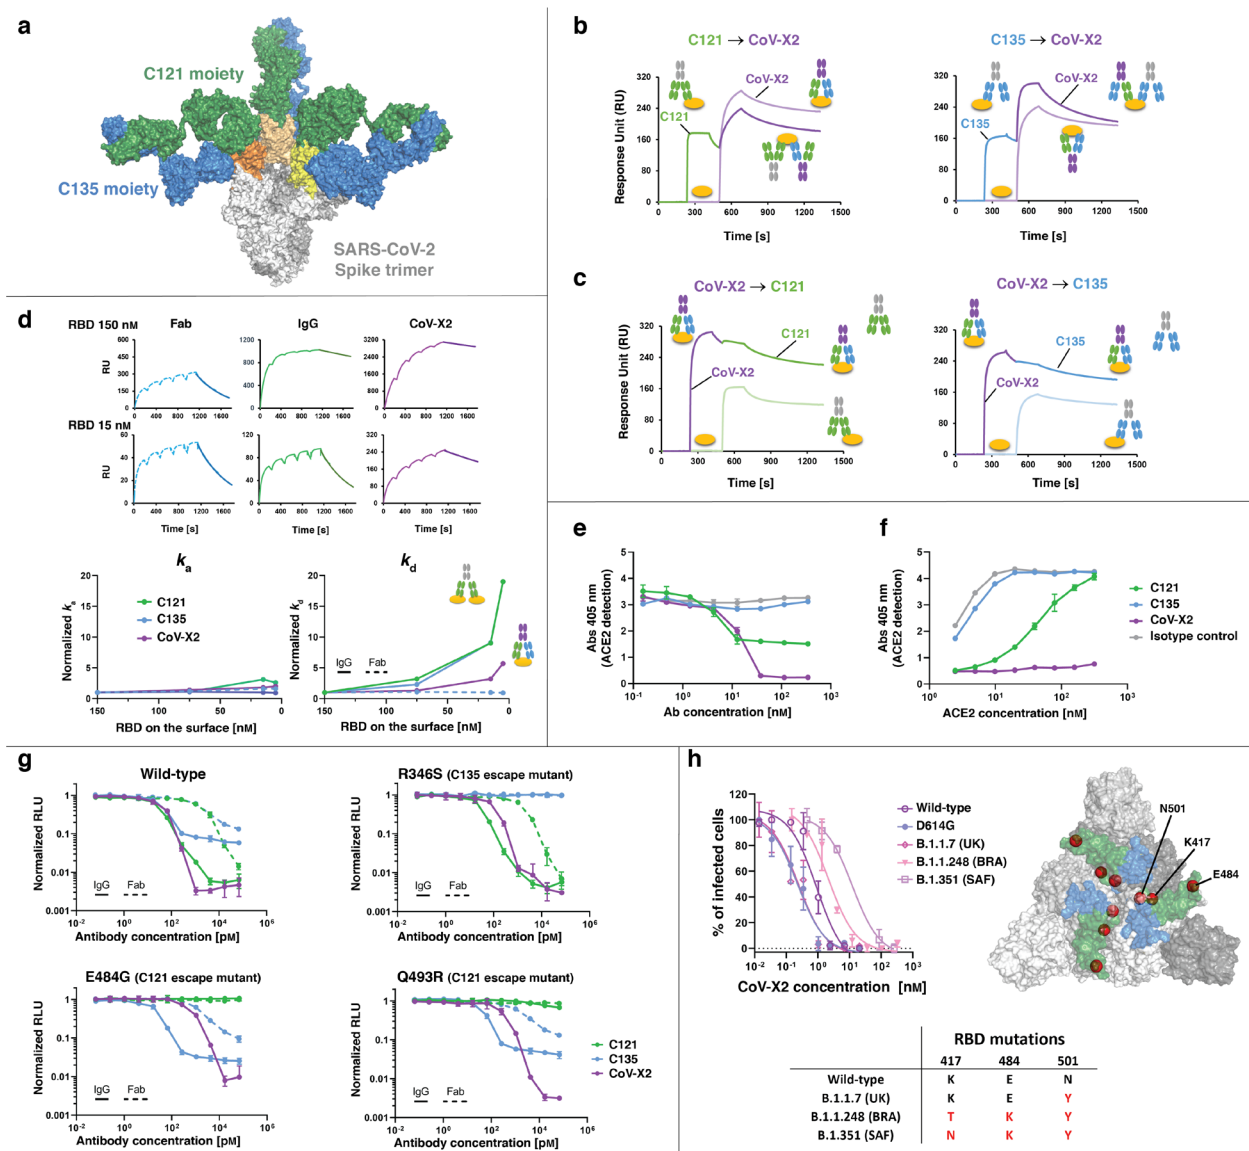

78 **Fig.1 | Biochemical and *in vitro* neutralizing properties of CoV-X2 are superior to its parental mAbs.**  
 79 **a**, Computational simulations predict bivalent binding of CoV-X2 to all three RBDs on the S trimer (see  
 80 also Extended Data Fig.2). Green and blue are C121 and C135 moieties, respectively; RBDs are in shades  
 81 of yellow/orange. **b**, **c**, SPR demonstrates that both arms of CoV-X2 are functional. In (**b**), immobilized  
 82 RBD complexed with the indicated mAb (first antibody) binds to CoV-X2 (second antibody). In (**c**), the  
 83 RBD/CoV-X2 complex prevents binding by the single mAbs. Shaded colors are controls (second antibody  
 84 only). **d**, Both arms of CoV-X2 bind simultaneously to the RBD since, contrary to the monoclonals, avidity  
 85 is retained at decreasing RBD concentrations. On top, representative SPR traces indicating the different  
 86 dissociations of antibodies (or Fab) binding to RBD immobilized at different concentrations on the SPR  
 87 chip (see also Extended Data Fig.6). At the bottom, plots of the normalized  $k_a$  and  $k_d$  values obtained with  
 88 different concentrations of immobilized RBD. Increasing normalized dissociation rate ( $k_d$ ) values indicate  
 89 loss of avidity. **e**, **f**, CoV-X2 fully prevents ACE2 binding to S trimer in ELISA. ACE2 binding to



91 antibody/S trimer complexes is measured either with increasing concentration of the indicated antibody and  
92 constant ACE2 (e), or at constant antibody concentration with increasing ACE2 (f). Mean with standard  
93 deviation of two experiments is shown. g, CoV-X2 neutralizes SARS-CoV-2 pseudovirus and escape  
94 mutants of its parental mAbs. Normalized relative luminescence (RLU) for cell lysates after infection with  
95 nanoluc-expressing SARS-CoV-2 pseudovirus in the presence of increasing concentrations of antibodies.  
96 Wild-type SARS-CoV-2 pseudovirus (left) is shown alongside three escape mutants generated in the  
97 presence of C121 or C135<sup>15</sup>. Dashed lines are parental Fabs. Mean with standard deviation; one of two  
98 independent experiments. h, Neutralization of SARS-CoV-2 isolates with sequences corresponding to  
99 viruses first isolated in China (wild-type), Italy (D614G), United Kingdom (UK; B.1.1.7), Brazil (BRA;  
100 B.1.1.248) and South Africa (SAF; B.1.351). RBD residues mutated in the variants are indicated in the  
101 table and as red spheres on the S trimer structure, where the epitope of C135 (blue) and C121 (green) are  
102 shown.

103  
104  
105 CoV-X2 also bound to pre-formed C121/RBD and C135/RBD complexes, thus confirming  
106 that both of its arms are functional (Fig.1b,c). Next, an avidity assay by Surface Plasmon  
107 Resonance (SPR) was used to experimentally confirm the computational prediction that CoV-X2  
108 can simultaneously engage two sites on the same RBD (Methods, Fig.1d and Extended Data Fig.6).  
109 Avidity occurs when IgGs bind bivalently to antigens, resulting in slower dissociation rates ( $k_d$ )  
110 (Extended Data Fig.6a). Accordingly, C121 and C135 IgG showed avidity at high antigen  
111 concentrations due to inter-molecular binding of adjacent RBDs; at lower antigen concentrations  
112 the dissociation rate was instead faster since inter-molecular binding was prevented by the  
113 increased distance between RBD molecules, resulting in loss of avidity. Intra-molecular avidity is  
114 not possible for C121 and C135 since a single epitope is available on each RBD molecule. By  
115 contrast, CoV-X2 maintained avidity even at low antigen concentrations, indicating bivalent, intra-  
116 molecular binding (Fig.1d and Extended Data Fig.6). ELISA assays were then performed to  
117 evaluate the ability of CoV-X2 to inhibit the binding of recombinant ACE2 to the S trimer  
118 (Fig.1e,f). In line with the structural information<sup>10</sup>, C135 did not affect the ACE2/S interaction.  
119 C121, which occupies the ACE2 binding site on the RBD, prevented ACE2 binding but only  
120 partially. By contrast, ACE2 binding was not detected in the presence of CoV-X2, suggesting a  
121 synergistic effect by the two moieties composing the bispecific.

122 To assess the neutralizing ability of CoV-X2 *in vitro*, we first used SARS-CoV-2  
123 pseudoviruses<sup>16</sup>. The bispecific neutralized pseudovirus carrying wild-type SARS-CoV-2 S at sub-  
124 nanomolar concentrations ( $IC_{50} = 0.04$  nM (5.8 ng/mL);  $IC_{90} = 0.3$  nM (44 ng/mL)), which was  
125 similar or better than the parental IgGs and >100-fold better  $IC_{50}$  than the parental Fabs (Fig.1g).  
126 CoV-X2 remained effective against pseudoviruses bearing escape mutations that made them  
127 resistant to the individual mAbs (Fig.1g)<sup>15</sup> and against a pseudovirus with RBD mutations found  
128 in the B.1.351 variant (first reported in South Africa,  $IC_{50} = 1.3$  nM (191 ng/mL); Extended data  
129 Fig. 5). To confirm CoV-X2 efficacy, we performed plaque reduction neutralization assays with  
130 infectious virus. CoV-X2 efficiently neutralized: SARS-CoV-2 ( $IC_{50} = 0.9$  nM); the D614G variant  
131 first appearing in Europe (B.1,  $IC_{50} = 0.2$  nM); the B.1.1.7 variant first observed in the United  
132 Kingdom ( $IC_{50} = 0.2$  nM); the B.1.1.248 variant first isolated in Brazil ( $IC_{50} = 2.1$  nM) and B.1.351  
133 first isolated in South Africa ( $IC_{50} = 12$  nM; Fig.1h). The latter two have almost identical mutations  
134 in the RBD, the only difference being N vs. T at position 417, which does not interact with  
135 CoV-X2. Nonetheless, neutralization of B.1.351 was lower, suggesting either some  
136 conformational differences in the RBD or long-range effects deriving from other mutations in the  
137 S protein. A similar behavior is seen with the wild-type sequence (D614), which has lower  
138 neutralization than G614 even if no other difference is present; a plausible explanation is that G614  
139 makes the CoV-X2 epitopes more accessible by favoring the RBD ‘up’ conformation.<sup>17</sup> We  
140 conclude that the *in vitro* binding and neutralizing properties of CoV-X2 make it preferable over  
141 its parental antibodies.

142 To assess the clinical potential of CoV-X2, we investigated its ability to protect animals  
143 from infection and disease. We first developed a novel mouse model in which human ACE2



153 SARS-CoV-2-infected mice by plaque assays. Mean with standard deviation; the dashed line indicates the  
154 limit of detection. **c**, Kinetic of viral RNA levels in lung samples from SARS-CoV-2-infected mice by RT-  
155 qPCR. Mean with standard deviation. **d**, Schematic of the experimental layout. Wild-type mice were  
156 transduced with AAV-hACE2 by forced inhalation. After >7 days, mice were inoculated intraperitoneally  
157 (i.p) with 150 µg of antibodies. One day later, the mice were infected intranasally (i.n.) with SARS-CoV-2  
158 ( $1 \times 10^4$  pfu). **e**, Changes in body weight upon infection were monitored daily in antibody-treated mice  
159 (C121, n=9; C135, n=5; CoV-X2, n=13; isotype control, n=10). Mean with standard deviation is shown. **f**,  
160 Lung viral burden by plaque assay at 5 dpi (isotype control, n=6; CoV-X2, n=10). The dashed line indicates  
161 the limit of detection; mean with standard deviation. P value was calculated with two-tailed Student's t test.  
162 **g**, Spleen viral RNA levels by RT-qPCR at 5 and 8 dpi (gray: isotype control; purple: CoV-X2). Mean with  
163 standard deviation. P value was calculated with two-tailed Student's t test. **h**, Photographs of lungs collected  
164 from infected mice (8 dpi). **i**, Histopathology and F4/80 immunohistochemistry (IHC). Hematoxylin and  
165 Eosin-stained (H&E) sections of paraffin-embedded lungs from infected mice (8 dpi). Arrowheads point to  
166 foamy macrophages. F4/80 IHC shows abundant macrophage infiltration in lungs of mice treated with  
167 isotype control but not with CoV-X2.

168

169 This approach enables rapid production of large cohorts of animals and has the advantage of being  
170 applicable to wild-type and mutant mouse colonies, independently of age and gender. Moreover,  
171 since AAV vectors are only weakly immunogenic and cytotoxic, the system allows for prolonged  
172 expression of hACE2<sup>18-21</sup> (Extended Data Fig.7). SARS-CoV-2 infection of ACE2 humanized  
173 mice results in progressive weight loss, respiratory pathology and disease requiring culling on day  
174 8 post infection (dpi, Fig.2a–c and Extended Data Fig.7).

175 To evaluate the protective effect of antibodies, hACE2 mice were treated with antibody  
176 (150 µg) one day before SARS-CoV-2 challenge and monitored over time (Fig.2d–i). Upon  
177 intranasal infection with  $1 \times 10^4$  pfu of SARS-CoV-2 (SARS-CoV-2/human/Czech  
178 Republic/951/2020), isotype control treated animals showed weight loss starting at 3 dpi, and by  
179 8 dpi most animals had lost approximately 25–30% of their body weight reaching humane endpoint  
180 (Fig.2e). Infectious virus could be recovered from the lungs (Fig.2f), viral RNA was detected also  
181 in the spleen (Fig.2g) but not in the heart (data not shown). Lung pathology resembled severe  
182 COVID-19 in humans<sup>22</sup> and was characterized by Diffuse Alveolar Damage (DAD; 50-80% of  
183 tissue area), alveolar replacement with infiltrates of immune cells and fibroblasts, thickened septa

184 and infiltrations by activated macrophages with foamy cytoplasm (Fig.2i). In contrast, animals  
185 treated with CoV-X2 maintained their body weight ( $P < 0.0001$  at 4–8 dpi when compared to  
186 isotype; Fig.2e; P values between all groups in Extended Data Table1), had reduced viral RNA in  
187 the spleen (Fig.2g) and displayed neither macro- nor histopathological changes (DAD  $< 5-10\%$ ,  
188 Fig.2h,i). While infectious virus could be readily recovered from controls (5 of 6), it was only  
189 recovered from 1 out of 10 CoV-X2 treated animals at 5 dpi (Fig. 2f) and could not be recovered  
190 from any of 13 animals at 8 dpi (data not shown). Since none of the CoV-X2 treated mice exhibited  
191 symptoms at any time, we conclude that CoV-X2 protects mice from infection and disease.

192         Since monotherapy with C121 or C135 mAbs leads to virus escape *in vitro*<sup>15</sup>, we treated  
193 hACE2 mice with the individual antibodies and sequenced the virus. Only wild-type RBD  
194 sequences were obtained from controls (n=10). Instead, the virus in mice treated with C121  
195 selected for a mutation resulting in E484D (5 of 5 mice that were analyzed at 8 dpi). C121 escape  
196 mutations at E484 were previously observed *in vitro*<sup>15</sup> and changes at this residue (present also in  
197 the B.1.351 and B.1.1.248 variants) reduce neutralization by human sera by more than 10-fold<sup>23</sup>.  
198 E484D affects intermolecular H-bonds at the core of the C121/RBD interface and it is suggested  
199 to increase the RBD affinity for ACE2<sup>24</sup>. Virus with D484 is pathogenic, since 7 out of 9 mice  
200 treated with C121 developed disease (Fig.2e) and only D484 virus was found in their lungs. In  
201 contrast, and unlike the *in vitro* results<sup>15</sup>, no virus evasion or pathology was observed in mice  
202 treated with C135 (n=5; Fig.2e and data not shown). In CoV-X2 treated animals, even though no  
203 infectious virus was retrieved (8 dpi, n=13) and no symptoms ever noticed, low levels of residual  
204 viral RNA could be detected in some animals after 40 cycles of PCR amplification: in 6 of 13  
205 animals the virus sequence was wild-type and in 2 mice overlapping sequencing traces were  
206 consistent with coexistence of wild-type and D484. Thus, in those 2 of 13 animals with D484 CoV-

207 X2 remained protective even if the mutation diluted the effective antibody concentration,  
208 presumably leaving only the C135 moiety active. Finally, CoV-X2 was protective also when  
209 administered 12 hours after SARS-CoV-2 challenge (Extended Data Fig.8)

210 Monoclonal antibodies targeting the SARS-CoV-2 S are in advanced clinical trials and  
211 show promise against COVID-19<sup>1,2</sup>. Concomitant use of multiple antibodies is preferred for  
212 increased efficacy and added resistance against viral evasion. Indeed, the virus can escape pressure  
213 by a single antibody *in vitro* and, as shown here, also in animals. Moreover, RBD mutations  
214 threatening the efficacy of single monoclonals have already been detected in virus circulating in  
215 minks and humans<sup>25</sup>, including mutations at the C121 and C135 epitopes (Extended Data Fig.9).  
216 One disadvantage of antibody cocktails is the requirement for twice or more the development and  
217 production capacity than for single mAbs, which is a significant challenge in light of the  
218 augmented demand due to COVID-19 related vaccines and therapeutics on top of the need to  
219 maintain production of biologics for other diseases.<sup>4</sup>

220 Multispecific antibodies offer the advantages of cocktails in a single molecule. Indeed, we  
221 have shown that the CoV-X2 bispecific is more effective than the related monoclonals at inhibiting  
222 ACE2 binding; it has sub-nanomolar IC<sub>50</sub> against a broader array of viral sequences; and it protects  
223 animals from SARS-CoV-2 even when C121, its potent parental mAb, fails due to the insurgence  
224 of viral escape. C135, the other parental mAb, did not generate escape in our animal experiment  
225 but readily generated them *in vitro*<sup>15</sup>. CoV-X2 is expected to be more resistant to viral escape  
226 compared to monoclonals. Indeed, we have shown that CoV-X2 binds and neutralizes mutants not  
227 recognized by its parental mAbs as well as variants of concern that recently emerged in United  
228 Kingdom<sup>13</sup>, South Africa<sup>14</sup> and Brazil<sup>26</sup>.



229 CoV-X2, unlike other multispecifics<sup>27</sup>, is a fully human IgG-like molecule. As such, it has  
230 favorable developability and could be further engineered to alter effector functions. For example,  
231 the Fragment crystallizable (Fc) of CoV-X2 was already modified to modulate its interaction with  
232 Fc receptors and complement (LALA-PG mutations)<sup>28</sup> without affecting its antigen-binding  
233 properties. The LALA modification prevents Antibody Dependent Enhancement (ADE) of  
234 flavivirus infection<sup>29,30</sup> and it may be a desirable modification also in the context of SARS-CoV-  
235 2, since cellular and animal experiments with coronaviruses, including SARS-CoV<sup>31-33</sup>, support  
236 the possibility of ADE. Other modifications, like LS<sup>28</sup> for increased half-life, are easily achievable.  
237 Finally, CoV-X2 is human-derived and produced in a format (CrossMab) already shown to be safe  
238 in clinical trials<sup>34</sup>, which further supports its developability. Thus, IgG-like bispecifics are worth  
239 adding to the arsenal employed to combat SARS-CoV-2 and its plausible future mutations.

240

## 241 **References:**

- 242 1 DeFrancesco, L. COVID-19 antibodies on trial. *Nat Biotechnol* **38**, 1242-1252,  
243 doi:10.1038/s41587-020-0732-8 (2020).
- 244 2 Klasse, P. J. & Moore, J. P. Antibodies to SARS-CoV-2 and their potential for  
245 therapeutic passive immunization. *Elife* **9**, doi:10.7554/eLife.57877 (2020).
- 246 3 Robbiani, D. F. *et al.* Convergent antibody responses to SARS-CoV-2 in convalescent  
247 individuals. *Nature* **584**, 437-442, doi:10.1038/s41586-020-2456-9 (2020).
- 248 4 Dawn M. Ecker & Seymour, P. Supply and Demand Trends: Mammalian  
249 Biomanufacturing Industry Overview. *CPhlinsights* (2020).
- 250 5 Baum, A. *et al.* REGN-COV2 antibodies prevent and treat SARS-CoV-2 infection in  
251 rhesus macaques and hamsters. *Science* **370**, 1110-1115, doi:10.1126/science.abe2402  
252 (2020).
- 253 6 Schäfer, A. *et al.* Antibody potency, effector function, and combinations in protection  
254 and therapy for SARS-CoV-2 infection in vivo. *Journal of Experimental Medicine* **218**,  
255 doi:10.1084/jem.20201993 (2020).
- 256 7 Schlake, T. *et al.* mRNA: A Novel Avenue to Antibody Therapy? *Mol Ther* **27**, 773-784,  
257 doi:10.1016/j.ymthe.2019.03.002 (2019).
- 258 8 Tiwari, P. M. *et al.* Engineered mRNA-expressed antibodies prevent respiratory syncytial  
259 virus infection. *Nature communications* **9**, 3999, doi:10.1038/s41467-018-06508-3  
260 (2018).



- 261 9 Rybakova, Y. *et al.* mRNA Delivery for Therapeutic Anti-HER2 Antibody Expression  
262 In Vivo. *Mol Ther* **27**, 1415-1423, doi:10.1016/j.ymthe.2019.05.012 (2019).
- 263 10 Barnes, C. O. *et al.* SARS-CoV-2 neutralizing antibody structures inform therapeutic  
264 strategies. *Nature*, doi:10.1038/s41586-020-2852-1 (2020).
- 265 11 Schaefer, W. *et al.* Immunoglobulin domain crossover as a generic approach for the  
266 production of bispecific IgG antibodies. *Proc Natl Acad Sci U S A* **108**, 11187-11192,  
267 doi:10.1073/pnas.1019002108 (2011).
- 268 12 Walls, A. C. *et al.* Structure, Function, and Antigenicity of the SARS-CoV-2 Spike  
269 Glycoprotein. *Cell* **181**, 281-292.e286, doi:10.1016/j.cell.2020.02.058 (2020).
- 270 13 Kemp, S. *et al.* Recurrent emergence and transmission of a SARS-CoV-2 Spike deletion  
271  $\Delta$ H69/V70. *bioRxiv*, 2020.2012.2014.422555, doi:10.1101/2020.12.14.422555 (2020).
- 272 14 Tegally, H. *et al.* Emergence and rapid spread of a new severe acute respiratory  
273 syndrome-related coronavirus 2 (SARS-CoV-2) lineage with multiple spike mutations in  
274 South Africa. *medRxiv*, 2020.2012.2021.20248640, doi:10.1101/2020.12.21.20248640  
275 (2020).
- 276 15 Weisblum, Y. *et al.* Escape from neutralizing antibodies by SARS-CoV-2 spike protein  
277 variants. *eLife* **9**, e61312, doi:10.7554/eLife.61312 (2020).
- 278 16 Schmidt, F. *et al.* Measuring SARS-CoV-2 neutralizing antibody activity using  
279 pseudotyped and chimeric viruses. *J Exp Med* **217**, doi:10.1084/jem.20201181 (2020).
- 280 17 Benton, D. J. *et al.* The effect of the D614G substitution on the structure of the spike  
281 glycoprotein of SARS-CoV-2. *Proceedings of the National Academy of Sciences* **118**,  
282 e2022586118, doi:10.1073/pnas.2022586118 (2021).
- 283 18 Han, K. *et al.* Lung Expression of Human ACE2 Sensitizes the Mouse to SARS-CoV-2  
284 Infection. *Am J Respir Cell Mol Biol*, doi:10.1165/rcmb.2020-0354OC (2020).
- 285 19 Hassan, A. O. *et al.* A SARS-CoV-2 Infection Model in Mice Demonstrates Protection  
286 by Neutralizing Antibodies. *Cell* **182**, 744-753.e744, doi:10.1016/j.cell.2020.06.011  
287 (2020).
- 288 20 Sun, J. *et al.* Generation of a Broadly Useful Model for COVID-19 Pathogenesis,  
289 Vaccination, and Treatment. *Cell* **182**, 734-743.e735, doi:10.1016/j.cell.2020.06.010  
290 (2020).
- 291 21 Sun, S. H. *et al.* A Mouse Model of SARS-CoV-2 Infection and Pathogenesis. *Cell Host*  
292 *Microbe* **28**, 124-133.e124, doi:10.1016/j.chom.2020.05.020 (2020).
- 293 22 Deshmukh, V., Motwani, R., Kumar, A., Kumari, C. & Raza, K. Histopathological  
294 observations in COVID-19: a systematic review. *Journal of clinical pathology*, jclinpath-  
295 2020-206995, doi:10.1136/jclinpath-2020-206995 (2020).
- 296 23 Greaney, A. J. *et al.* Comprehensive mapping of mutations to the SARS-CoV-2 receptor-  
297 binding domain that affect recognition by polyclonal human serum antibodies. *bioRxiv*,  
298 2020.2012.2031.425021, doi:10.1101/2020.12.31.425021 (2021).
- 299 24 Chen, J., Wang, R., Wang, M. & Wei, G. W. Mutations Strengthened SARS-CoV-2  
300 Infectivity. *J Mol Biol* **432**, 5212-5226, doi:10.1016/j.jmb.2020.07.009 (2020).
- 301 25 Weisblum, Y. *et al.* Escape from neutralizing antibodies by SARS-CoV-2 spike protein  
302 variants. *Elife* **9**, doi:10.7554/eLife.61312 (2020).
- 303 26 Hoffmann, M. *et al.* SARS-CoV-2 variants B.1.351 and B.1.1.248: Escape from  
304 therapeutic antibodies and antibodies induced by infection and vaccination. *bioRxiv*,  
305 2021.2002.2011.430787, doi:10.1101/2021.02.11.430787 (2021).

- 306 27 Dong, J. *et al.* Development of humanized tri-specific nanobodies with potent  
307 neutralization for SARS-CoV-2. *Scientific reports* **10**, 17806, doi:10.1038/s41598-020-  
308 74761-y (2020).
- 309 28 Saunders, K. O. Conceptual Approaches to Modulating Antibody Effector Functions and  
310 Circulation Half-Life. *Frontiers in immunology* **10**, 1296,  
311 doi:10.3389/fimmu.2019.01296 (2019).
- 312 29 Dejnirattisai, W. *et al.* Cross-reacting antibodies enhance dengue virus infection in  
313 humans. *Science* **328**, 745-748, doi:328/5979/745 [pii]  
314 10.1126/science.1185181 (2010).
- 315 30 Sridhar, S. *et al.* Effect of Dengue Serostatus on Dengue Vaccine Safety and Efficacy. *N*  
316 *Engl J Med* **379**, 327-340, doi:10.1056/NEJMoa1800820 (2018).
- 317 31 Yip, M. S. *et al.* Antibody-dependent infection of human macrophages by severe acute  
318 respiratory syndrome coronavirus. *Virol J* **11**, 82, doi:10.1186/1743-422x-11-82 (2014).
- 319 32 Jaume, M. *et al.* Anti-severe acute respiratory syndrome coronavirus spike antibodies  
320 trigger infection of human immune cells via a pH- and cysteine protease-independent  
321 FcγR pathway. *J Virol* **85**, 10582-10597, doi:10.1128/jvi.00671-11 (2011).
- 322 33 Yip, M. S. *et al.* Antibody-dependent enhancement of SARS coronavirus infection and its  
323 role in the pathogenesis of SARS. *Hong Kong Med J* **22**, 25-31 (2016).
- 324 34 Klein, C. *et al.* Engineering therapeutic bispecific antibodies using CrossMab technology.  
325 *Methods* **154**, 21-31, doi:10.1016/j.ymeth.2018.11.008 (2019).  
326

327 **Acknowledgements**

328 *Dedicated to the memory of the recently departed Prof. François Diederich.*

329 This work was supported by: the European Union's Horizon 2020 research and innovation  
330 program under grant agreement No. 101015756, ATAC consortium (EC 101003650; D.F.R., L.V.,  
331 Q.P.H., F.B., L.C.); SNF grant 31003A\_182270 (L.V.); Lions Club Monteceneri (L.V.); George  
332 Mason University Fast Grant (D.F.R.); NIH grant P01-AI138398-S1 (M.C.N., P.J.B.);  
333 2U19AI111825 (M.C.N., D.F.R.); the Caltech Merkin Institute for Translational Research and P50  
334 AI150464 (P.J.B.); R37-AI64003 (P.D.B.); R01AI78788 (T.H.); P.D.B. and M.C.N. are Howard  
335 Hughes Medical Institute Investigators. The study was also supported by: the Czech Academy of  
336 Sciences and Czech Ministry of Agriculture (RVO 68378050; R.S.; RVO0518; D.R.); Czech  
337 Ministry of Education, Youth and Sports and the European Regional Development Fund  
338 (LM2018126; CZ.1.05/2.1.00/19.0395 and CZ.1.05/1.1.00/02.0109; R.S.;  
339 CZ.02.1.01/0.0/0.0/15\_003/0000495; D.R.); Czech Science Foundation (20-14325S, D.R.); and  
340 by Ricerca Finalizzata from Ministry of Health, Italy (grants no. GR-2013-02358399; A.P.).

341 We are grateful for the high-performance computing resources provided by CINECA, Dr. Sanzio  
342 Bassini, to Prof. Michael Hust, Dr. Federico Bertoglio and Elisa Restivo. We thank Vaclav  
343 Zatecka, Veronika Martinkova, and Linda Kutlikova for technical assistance.

344

345 **Author contributions**

346 R.D.G, M.Pe., L.S., F.Mu., J.C.L., F.Ma, D.M., C.I., E.P., S.D.G., M.Pa., F.B., D.M., S.Gi., C.O.B,  
347 F.B., J.C.S, F.G, S.Ga, designed and carried out experiments and analyzed results, produced  
348 plasmids, antibodies and viral proteins. P.N., T.M., J.H., V.H, B.M., N.P., A.F., J.T., V.I., M.Pa.,  
349 D.Z., P.B., I.B., P.S., D.R., performed animal experiments and analyzed the results. L.V, D.F.R.,  
350 D.R., Q.P.H., A.P., L.C., P.J.B., M.C.N., P.D.B., T.H. conceived and designed study and

351 experiments and analyzed the results. P.N., T.M., R.N., O.P., J.P., J.R., R.S. conceived and  
352 designed the mouse model. L.V., D.F.R., D.R, R.D.G. wrote the manuscript with input from all  
353 co-authors.

### 354 **Competing interests**

355 In connection with this work the Institute for Research in Biomedicine has filed a provisional  
356 patent application on which L.V. is inventor (PCT/EP2020/085342). The Rockefeller University  
357 has filed a provisional patent application on coronavirus antibodies on which D.F.R. and M.C.N.  
358 are inventors.

359

### 360 **Extended data figures**

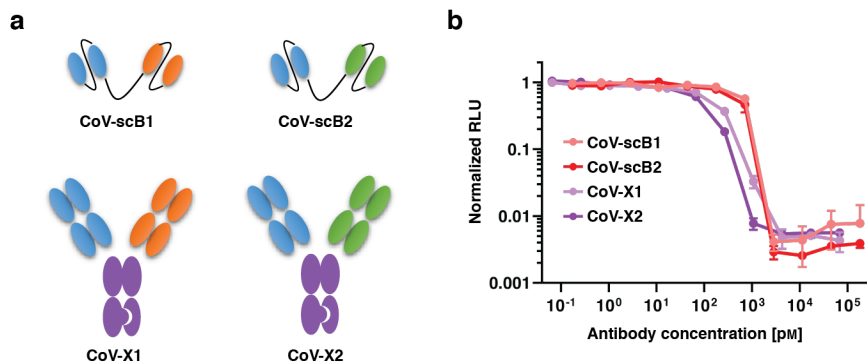

361 **Extended Data Fig.1 | Neutralization of SARS-CoV-2 pseudovirus by bispecific antibodies.** **a,**  
362 Schematic representation of the 4 bispecific constructs; two in scFv format and two as IgG-like CrossMab  
363 with knob-in-hole. The parental monoclonals forming the bispecifics are color-coded (C135 blue, C144  
364 orange, C121 green; Fc region in purple). **b,** All 4 constructs neutralize SARS-CoV-2 pseudovirus *in vitro*  
365 at sub-nanomolar concentrations (IC<sub>50</sub>: 0.13, 0.04, 0.74 and 0.53 nM for CoV-X1, CoV-X2, CoV-scB1 and  
366 CoV-scB2, respectively). Normalized relative luminescence values, which correlate to infection, are  
367 reported versus antibody concentration, as detailed in Schmidt *et al.*<sup>16</sup>. Mean with standard deviation is  
368 shown, representative of two independent experiments.

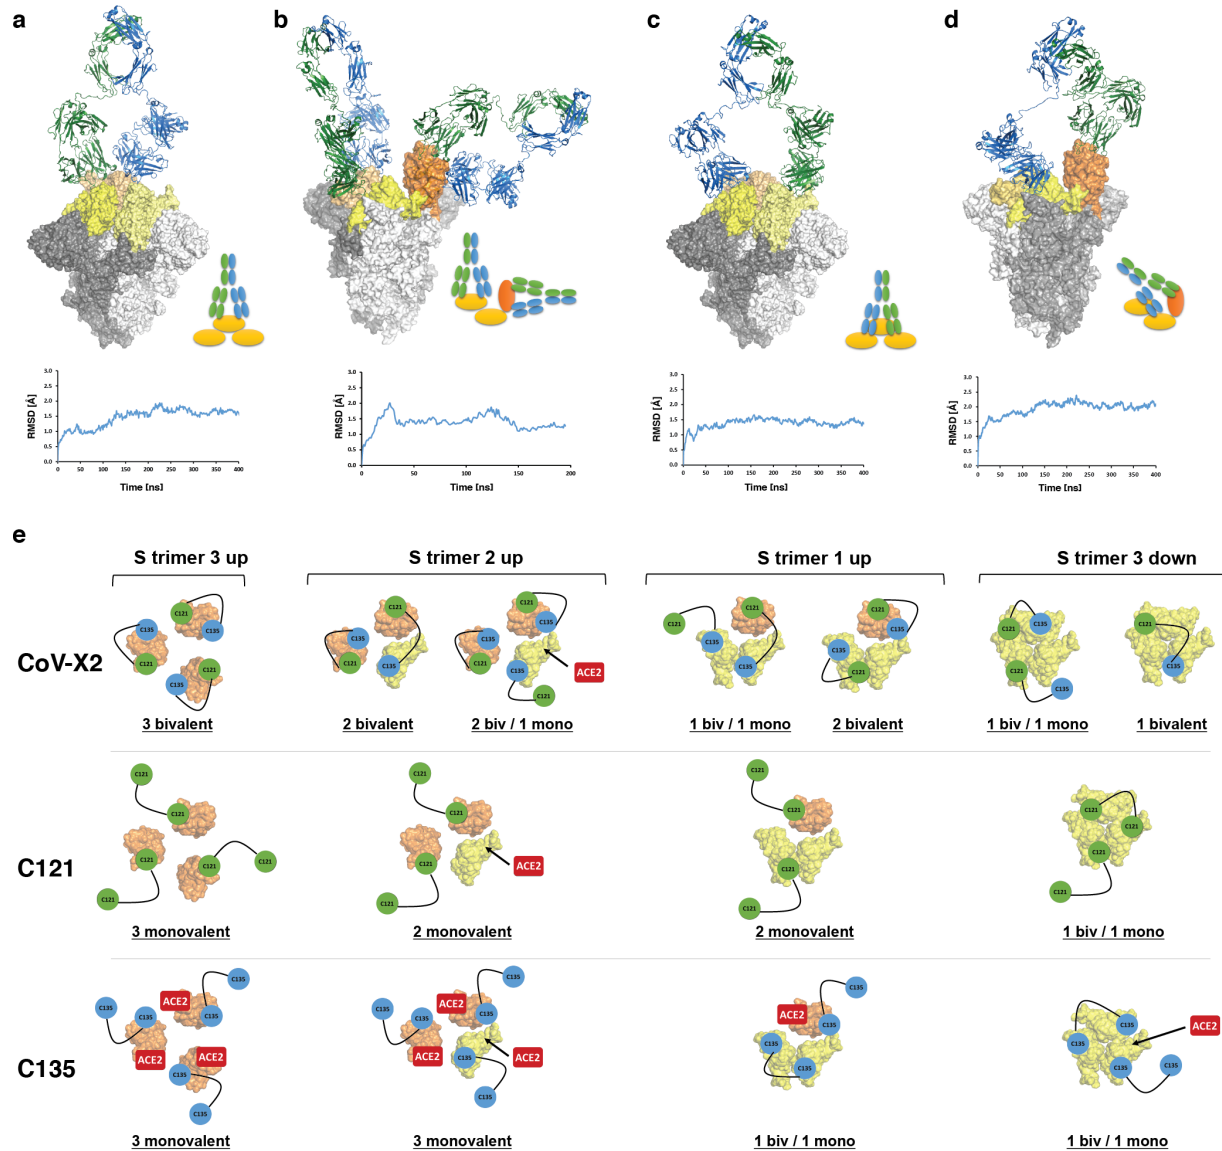

370

371 **Extended Data Fig.2 | CoV-X2 engages its epitopes on all RBD conformations on the S trimer. a–d,**  
 372 Molecular Dynamics (MD) simulations of the complex between the CoV-X2 bispecific and S trimers with  
 373 RBD in either all down, all up or mixed up/down conformations show that CoV-X2 can engage a single  
 374 RBD with both arms (a,b), two adjacent RBDs in the down conformation (c), and two RBDs in the up/down  
 375 conformation (b,d). The complexes were subjected to up to 400 ns of fully atomistic MD simulations to  
 376 assess feasibility and stability of the bound conformations. Root-mean-squared deviations (RMSD) values  
 377 are shown to indicate structural stability. S trimer is in shades of grey, RBDs in yellow (down conformation)  
 378 and orange (up), the C121 and C135 moieties of CoV-X2 are in green and blue, respectively. e, Schematic  
 379 representation of the computationally predicted binding modes of CoV-X2, C121 IgG and C135 IgG on the  
 380 S trimer, colored as in a–d. Antibodies are represented by connected circles; ACE2 is in red on the RBD if  
 381 it can bind directly to a given conformation; it has an arrow pointing to the RBD if ACE2 binding is  
 382 achieved after an allowed switch to the up conformation. For example, in the 3-up conformation (left),  
 383 CoV-X2 can engage all the RBDs with bivalent binding, whereas C121 and C135 can only achieve  
 384 monovalent binding. C135 binding does not prevent interaction with ACE2. The situation is similar in the

385 other S conformations (2-up 1-down, 2-down 1-up and 3-down), with only the bispecific achieving bivalent  
386 interaction and preventing ACE2 access in all conformations.

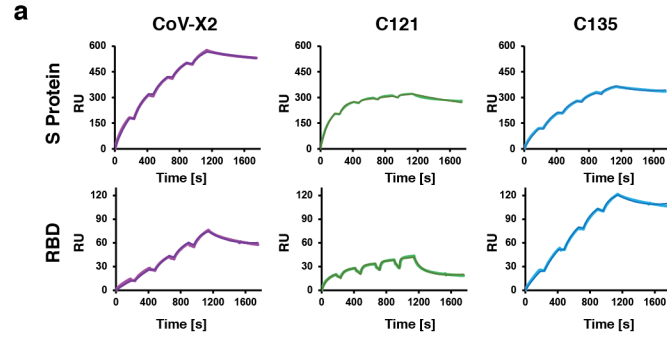

**b**

|               |                                                      | CoV-X2 | C121 | C135 |
|---------------|------------------------------------------------------|--------|------|------|
| Spike protein | $k_a$ [ $\cdot 10^6 \text{ M}^{-1} \text{ s}^{-1}$ ] | 0.69   | 1.33 | 0.62 |
|               | $k_d$ [ $\cdot 10^{-3} \text{ s}^{-1}$ ]             | 0.12   | 0.17 | 0.13 |
|               | $K_D$ [nM]                                           | 0.18   | 0.13 | 0.21 |
| RBD           | $k_a$ [ $\cdot 10^6 \text{ M}^{-1} \text{ s}^{-1}$ ] | 0.58   | 1.30 | 0.20 |
|               | $k_d$ [ $\cdot 10^{-3} \text{ s}^{-1}$ ]             | 1.35   | 3.15 | 0.12 |
|               | $K_D$ [nM]                                           | 2.35   | 2.40 | 0.59 |

387

388 **Extended Data Fig.3 | CoV-X2 and its parental mAbs bind recombinant, isolated RBD and S trimer**  
 389 **with low nanomolar affinity. a,** Representative SPR traces from which the data in (b) was derived. **b,**  
 390 Kinetic parameters for the binding of C121 IgG, C135 IgG, and CoV-X2 to S trimer and RBD.



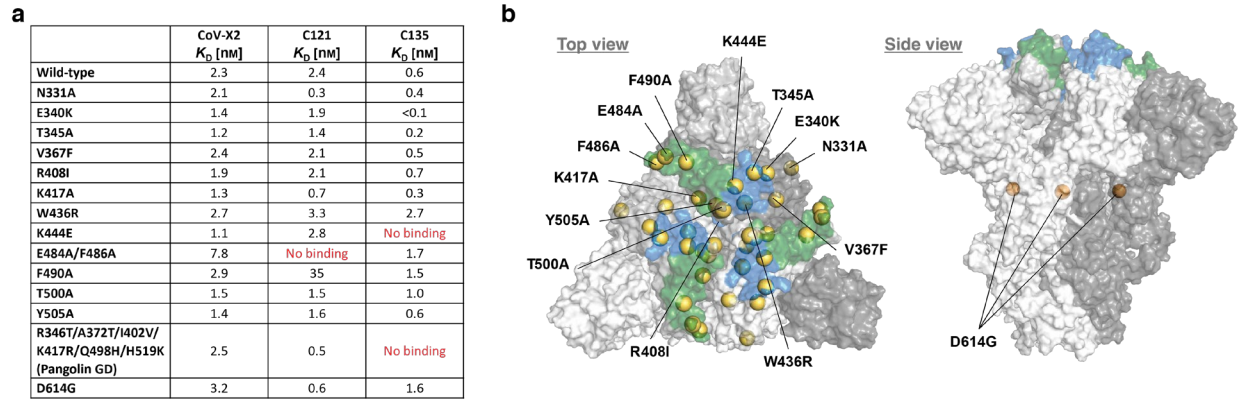

391

392 **Extended Data Fig.4 | CoV-X2 binds with low-nanomolar affinity to S protein mutants, including**  
 393 **some that are not recognized by the parental mAbs C121 and C135. a,** SPR-derived binding affinities  
 394 of CoV-X2, C121 IgG and C135 IgG to several S trimer mutants. **b,** Mutations tested in **(a)**  
 395 by yellow spheres on the surface representation of the S trimer. The epitopes of C121 (green) and C135  
 396 (blue) are shown.

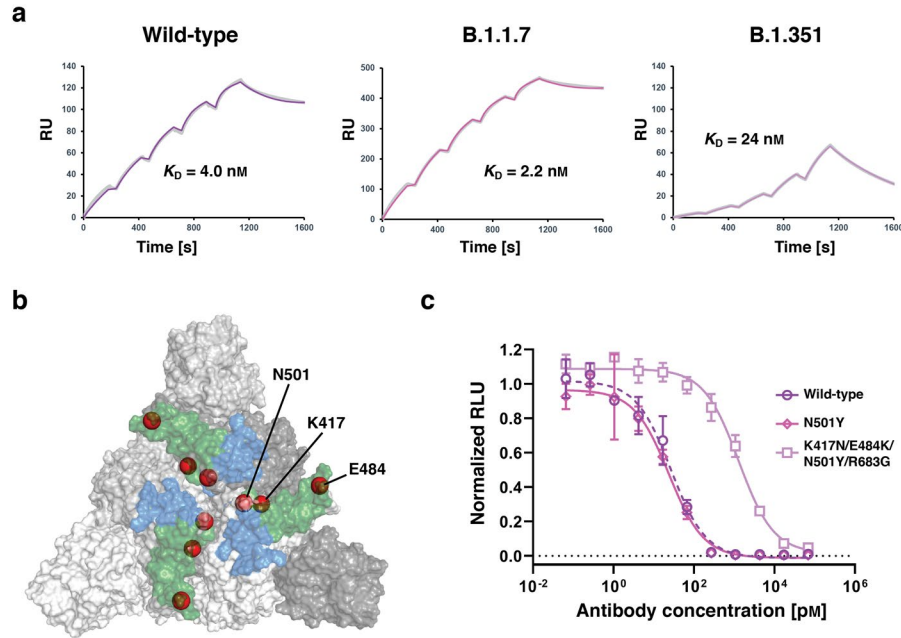

397

398 **Extended Data Fig.5 | Efficacy of CoV-X2 against B.1.1.7 and B.1.351 variants.** **a**, SPR traces showing  
399 binding of CoV-X2 to the RBD corresponding to wild-type, B.1.1.7 (also known as UK) and B.1.351 (also  
400 known as South African) variants of SARS-CoV-2. **b**, Residues mutated in the variants are shown as red  
401 spheres on the surface representation of the S trimer. The epitopes of C121 (green) and C135 (blue) are  
402 shown. **c**, Neutralization of SARS-CoV-2 pseudoviruses expressing wild-type, N501Y and  
403 K417N/E484K/N501Y/R683G (corresponding to South African mutants in the RBD, see Figure 1h) S  
404 protein by CoV-X2.  
405

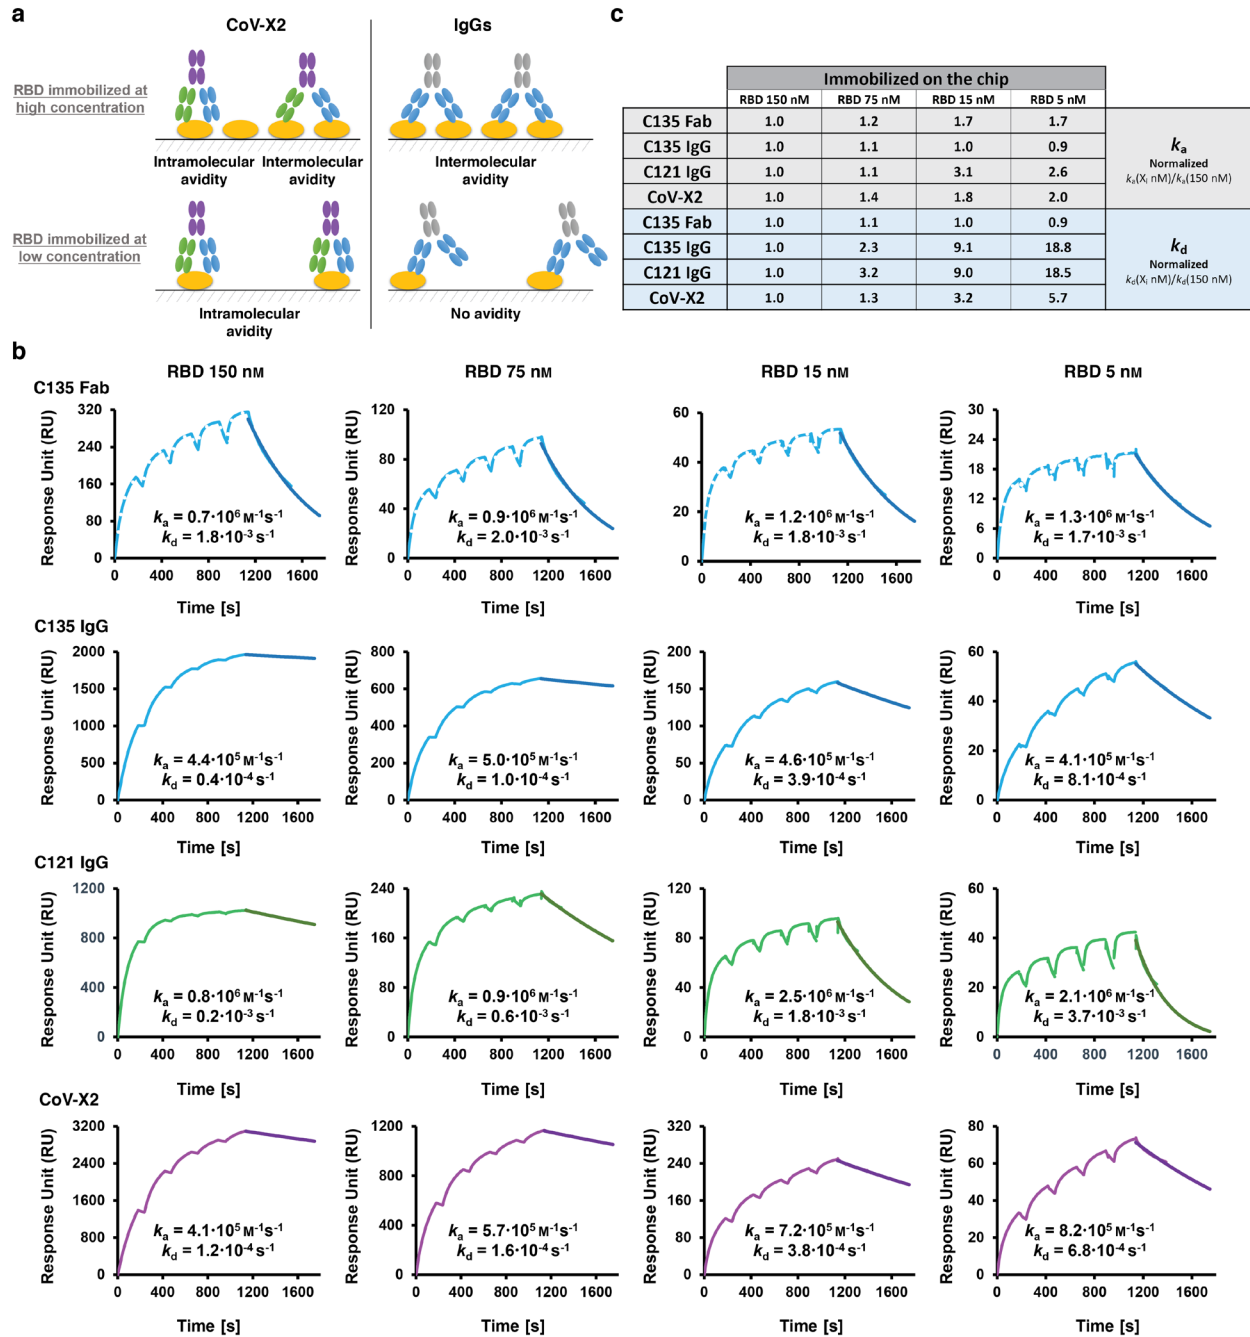

406  
407  
408  
409  
410  
411  
412  
413  
414  
415  
416

**Extended Data Fig.6 | SPR-based avidity assays confirm that CoV-X2 can engage bivalently on a single RBD.** **a**, CoV-X2 and monoclonal IgGs (C121 or C135) have different binding modes available when high or low quantities of RBD are immobilized on the surface of the SPR chip. mAbs have avidity effects at high RBD concentrations due to intermolecular binding, which results in slower dissociation rate ( $k_d$ ), but not at low RBD concentrations, since bivalent binding to a single RBD is impossible. In contrast, the bispecific has avidity at both high and low concentrations, since bivalent binding to its two epitopes on a single RBD is possible.  $k_a$  is not affected by avidity. **b**, Experimental confirmation that CoV-X2 engages bivalently on a single RBD. SPR traces used to determine  $k_a$  and  $k_d$  of mAbs, Fab and bispecific at different concentrations of immobilized RBD (see Fig.1d) are shown. **c**, Table summarizing the SPR results plotted in Fig.1d.  $k_a$  and  $k_d$  were normalized against the values at the highest RBD concentration.  $k_a$  and Fab  $k_d$  were

417 unaffected by the RBD concentration, as expected.  $k_d$  became faster for the monoclonals (loss of avidity)  
418 but less so for the bispecific (avidity maintained due to simultaneous binding to two sites on a single RBD).

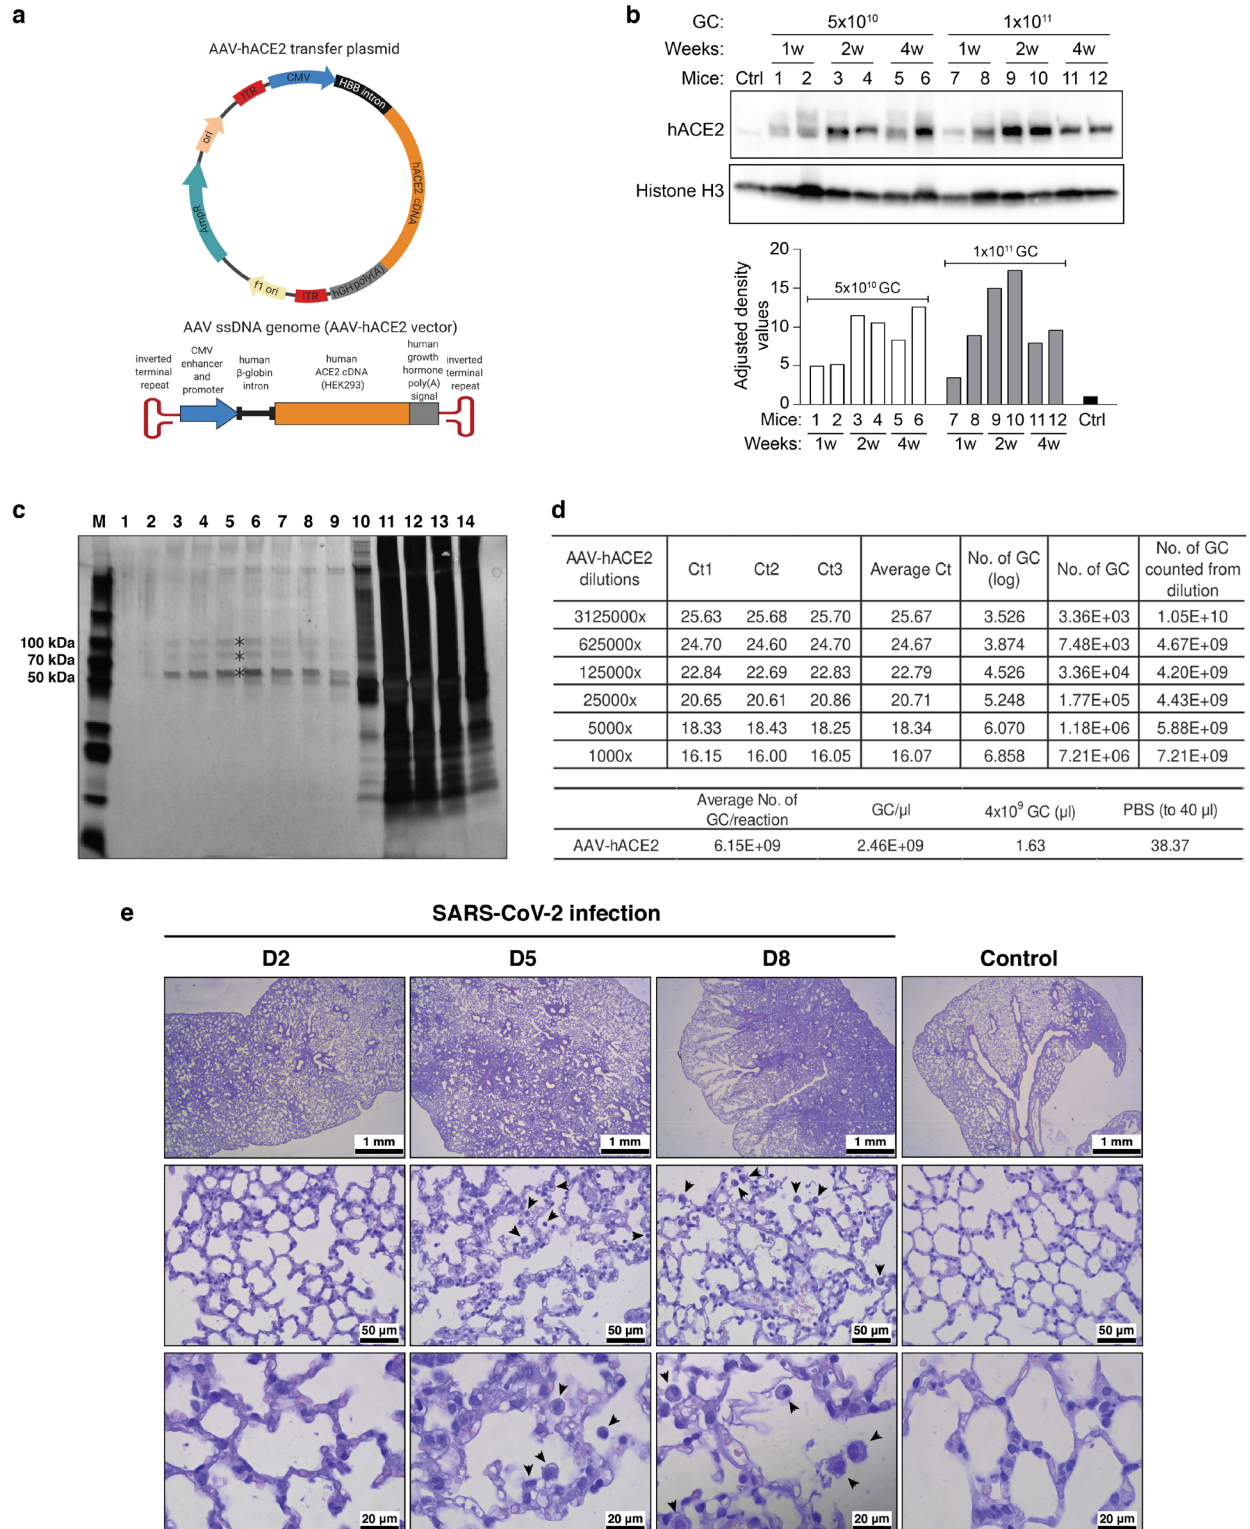

419  
420  
421  
422  
423  
424

**Extended Data Fig.7 | Generation of the new AAV-hACE2-transduced mouse model for COVID-19.**  
**a**, Diagram of the AAV-hACE2 plasmid and corresponding Adeno Associated viral vector. **b**, Western blot analysis detecting hACE2 expression in the lungs of one non-transduced control mouse (Ctrl) and 12 mice transduced with two different doses of AAV-hACE2 viral particles ( $5 \times 10^{10}$  or  $1 \times 10^{11}$  genome copies (GC)). Lung tissue was collected 1, 2, or 4 weeks (w) post transduction. Histone H3 was used as control for

425 quantification (bottom). **c**, Preparation of concentrated AAV-hACE2. AAV-hACE2 plasmid was co-  
426 transfected with pHelper and AAV Rep/Cap 2/9n vectors into 293AAV cells (see Methods). In order to  
427 increase viral titers, viral particles from both cell lysate and PEG-precipitated growth medium were  
428 ultracentrifuged in discontinuous iodixanol gradient. The silver-stained SDS-PAGE gel shows 14  
429 consecutive fractions: 1-9 represent enriched AAV fractions used for experiments, whereas fractions 10-  
430 14 are contaminated with proteinaceous cell debris. Iodixanol was chosen as a density gradient medium  
431 due to its low toxicity *in vivo* and its easy removal by ultrafiltration. M is protein marker, \* are AAV capsid  
432 proteins VP1, VP2, and VP3. **d**, The amount of AAV particles was estimated by qRT-PCR. The number of  
433 genome copies (GC) expressed as log was calculated from a standard curve. From one 15 cm<sup>2</sup> dish, 75  $\mu$ l  
434 with  $2.0 \times 10^{12}$  GC/ml were prepared, which is sufficient for hACE2 humanization of 37 mice. **e**, Kinetic of  
435 lung histopathology in SARS-CoV-2 infected ACE2 humanized mice. Hematoxylin and Eosin-stained  
436 sections showed inflammatory infiltrates composed of lymphocytes, macrophages, neutrophils, and  
437 fibroblasts replacing the alveoli. The size of the affected areas increased over time (area of diffuse alveolar  
438 damage: control <5-10%, 2 dpi <10-30%, 5 dpi 20-80 %, 8 dpi 50-90%). Alveolar septa were thickened in  
439 areas close to infiltrates. In samples collected at 5 and 8 dpi, an increased number of activated macrophages  
440 with foamy cytoplasm (black arrowheads) was seen. AAV-hACE2 transduced, SARS-CoV-2 uninfected  
441 mice were used as control and showed no significant pathology.

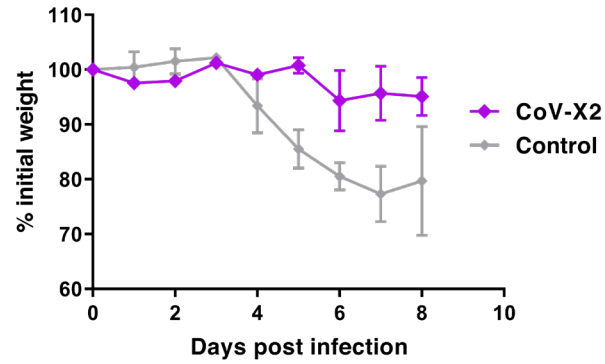

442  
443  
444  
445  
446  
447

**Extended Data Fig.8 | Post-exposure administration of CoV-X2 protects SARS-CoV-2 infected mice from disease.** Animals were infected intranasally with  $10^4$  pfu of SARS-CoV-2 and treated with 250  $\mu\text{g}/\text{mouse}$  of either isotype control antibody (n=3) or CoV-X2 (n=2) 12 hours later. Weight loss and pathological signs were apparent in control but not in CoV-X2 treated animals.



**a**

| wt     | mutant | Strain Name                                                                                                                          | wt     | mutant | Strain Name                                                                                                                                                                                                    |
|--------|--------|--------------------------------------------------------------------------------------------------------------------------------------|--------|--------|----------------------------------------------------------------------------------------------------------------------------------------------------------------------------------------------------------------|
| Arg403 | Lys    | /USA/VA-DCLS-0630/2020<br>/USA/VA-DCLS-0439/2020<br>/AUS/VIC1787/2020                                                                | Gly485 | Arg    | /AUS/VIC1829/2020<br>/AUS/VIC1960/2020<br>/AUS/VIC1693/2020<br>/AUS/VIC1660/2020<br>/AUS/VIC1683/2020<br>/AUS/VIC1588/2020<br>/AUS/VIC1565/2020<br>/AUS/VIC1611/2020<br>/AUS/VIC1812/2020<br>/AUS/VIC2023/2020 |
| Lys444 | Asn    | /AUS/VIC4515/2020                                                                                                                    |        |        |                                                                                                                                                                                                                |
| Gly446 | Asp    | /USA/FL-BPHL-2211/2020                                                                                                               |        |        |                                                                                                                                                                                                                |
|        | Val    | /USA/MN-MDH-1430/2020<br>/AUS/VIC913/2020<br>/AUS/VIC6087/2020<br>/AUS/VIC9542/2020                                                  |        |        |                                                                                                                                                                                                                |
| Leu452 | Gln    | /USA/VA-DCLS-1404/2020                                                                                                               | Cys488 | Arg    | /IRN/COVID19-IRVSH4/2020                                                                                                                                                                                       |
|        | Arg    | /USA/CA-CZB-12872/2020                                                                                                               | Phe490 | Leu    | /AUS/VIC10024/2020<br>/AUS/VIC766/2020                                                                                                                                                                         |
|        | Met    | /BHR/340798279_55_L001/2020<br>/USA/CA-CZB-1043/2020<br>/IND/906/2020                                                                |        | Pro491 | His                                                                                                                                                                                                            |
| Leu455 | Phe    | /AUS/VIC10121/2020<br>/AUS/VIC5196/2020                                                                                              | Gln493 | Leu    | /USA/WI-UW-371/2020                                                                                                                                                                                            |
| Val483 | Ala    | /USA/WA-UW-6527/2020<br>/USA/WA-UW-1587/2020<br>/USA/WA-RML-2/2020<br>/USA/WA-RML-6/2020<br>/USA/WA-RML-5/2020<br>/USA/UT-03764/2020 | Ser494 | Pro    | /USA/CA-CZB-4047/2020<br>/USA/CA-CZB-11677/2020<br>/USA/CA-CZB-6994/2020<br>/USA/CA-CZB-11010/2020<br>/USA/MI-MDHHS-SC20047/2020<br>/USA/CA-CZB-12810/2020<br>/AUS/VIC9505/2020                                |
|        |        | Phe                                                                                                                                  |        |        | /AUS/VIC2139/2020<br>/USA/MA-UW-629/2020                                                                                                                                                                       |
|        |        | Gln                                                                                                                                  |        |        | /USA/UT-UPHL-2009538/2020<br>/IND/GBRC278a/2020<br>/USA/SEARCH-1462-SAN/2020                                                                                                                                   |
|        | Glu484 | Lys                                                                                                                                  |        |        | /USA/UT-QDX-1869/2020<br>/BHR/340859913_511/2020<br>/USA/IL-UW-379/2020                                                                                                                                        |
|        | Ala    | /USA/VA-DCLS-1615/2020                                                                                                               |        |        |                                                                                                                                                                                                                |

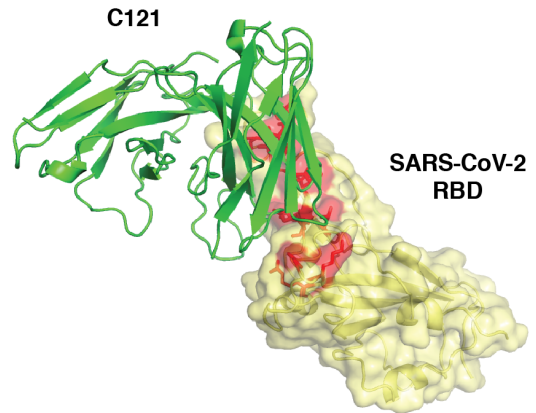

**b**

| wt     | mutant | Strain Name                              |
|--------|--------|------------------------------------------|
| Phe342 | Leu    | England/01_1/29                          |
| Ala344 | Ser    | /USA/WA-S2278/2020<br>/USA/WA-S2530/2020 |
|        | Thr    | /IND/GBRC431a/2020                       |
|        | Val    | /AUS/VIC10958/2020                       |
| Thr345 | Ser    | /USA/WA-S1049/2020                       |
|        | Ile    | /PER/covper051/2020                      |
| Arg346 | Thr    | /IND/GBRC333/2020                        |
| Trp436 | Thr    | /IND/GBRC333/2020                        |
| Asn439 | Lys    | /USA/IL-UW/799/2020                      |
| Asn440 | Lys    | /HKG/Case5138/2020                       |
| Leu441 | Ile    | /USA/FL-BPHL-0297/2020                   |
| Asn450 | Lys    | /IND/906/2020                            |

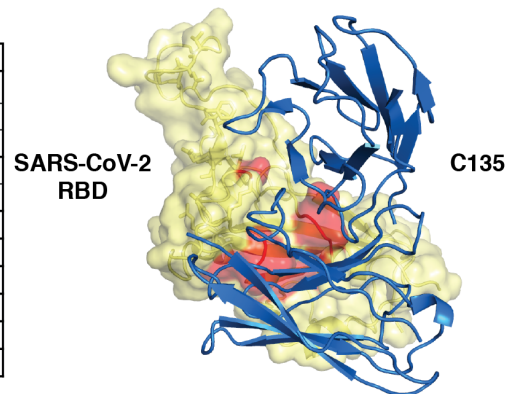

448

449 **Extended Data Fig.9 | Natural SARS-CoV-2 variants in the C121 and C135 epitopes.** Summary of  
 450 naturally occurring mutations in the C121 (a) or C135 (b) epitopes reported in circulating SARS-CoV-2  
 451 (as of January 1, 2021). The location of the mutated residues is shown in red on the RBD structure. C121  
 452 and C135 variable regions are in green and blue (PDB ID: 7K8X and 7K8Z respectively).  
 453

|                 | C121     | C135     | CoV-X2   | Isotype control |
|-----------------|----------|----------|----------|-----------------|
| C121            | –        | P<0.0001 | P<0.0001 | P<0.01          |
| C135            | P<0.0001 | –        | P>0.05   | P<0.0001        |
| CoV-X2          | P<0.0001 | P>0.05   | –        | P<0.0001        |
| Isotype control | P<0.01   | P<0.0001 | P<0.0001 | –               |

454  
455  
456  
457  
458  
459  
460  
461

**Extended Data Table 1 | Summary of the P values for the mouse protection experiment.** Statistical comparison of body weight differences in animals treated with the individual monoclonal antibodies (C121 or C135), the CoV-X2 bispecific or isotype control at 8 dpi (related to Fig. 2e). P values were determined with the ANOVA test. Comparison of the entire curves (Fig. 2e) by the One Sample Wilcoxon Test or by the ANOVA followed by Turkey-Kramer post-test reveals that the isotype control treated group is statistically different from any of the other groups (CoV-X2, C135, or C121; P<0.05).
